# Supplementary material for: Coordination behaviour of (diaryl disulfide)-bridged dinuclear thiairidaindan cores: ligand substitution by isocyanides, CO, hydrazines and hydroxylamine, and related reactions
Source: Royal Society of Chemistry journal article supplement (doi:10.1039/b201591a), 2002-01-01
Supplement: b201591a.doc [file b201591a.doc]

The supplementary material for B201591A, S. Matsukawa, S. Kuwata, Y. Ishii and M. Hidai, “Coordination behaviour of (diaryl disulfide)-bridged ·····”

**Table S1** Selected interatomic distances (Å) and bond angles (°) in **4a**·0.5C6H5CH33

| Ir(1)–Ir(2) | 3.586(1) | Ir–Cl | 2.40 (mean) |
| --- | --- | --- | --- |
| Ir(1)–S(1) | 2.342(2) | Ir–CH2 | 2.10 (mean) |
| Ir(1)–S(2) | 2.449(2) | Ir–CO | 1.93 (mean) |
| Ir(2)–S(1) | 2.471(2) | C–O | 1.13 (mean) |
| Ir(2)–S(2) | 2.331(2) | Ir–C–O | 176 (mean) |
| Ir–P | 2.33 (mean) |  |  |

**Table S2** Selected interatomic distances (Å) and bond angles (°) in **9**·2CH2Cl2

| Ir(1)–Ir(2) | 3.649(1) | Ir(2)–S(2) | 2.358(2) |
| --- | --- | --- | --- |
| Ir(1)–S(1) | 2.374(2) | Ir(2)–S(4) | 2.428(3) |
| Ir(1)–S(2) | 2.476(2) | Ir–P | 2.35 (mean) |
| Ir(1)–S(3) | 2.439(3) | Ir–CH22 | 2.10 (mean) |
| Ir(2)–S(1) | 2.490(2) | Ir–S–Mes | 120 (mean) |
